# Supplementary material for: The role of miRNAs 34a, 146a, 320a and 542 in the synergistic anticancer effects of methyl 2-(5-fluoro-2-hydroxyphenyl)-1H- benzo[d]imidazole-5-carboxylate (MBIC) with doxorubicin in breast cancer cells
Source: PeerJ journal article supplement (doi:10.7717/peerj.5577), 2018-09-17
Supplement: 2nd_original_westernblot_RAW_DATA._JULY18.pdf [file 2nd_original_westernblot_RAW_DATA._JULY18.pdf]

3. 4

Con Lps mbc Dms

75 -  
55 -  
43 -  
34 -  
26 -  
E1

← GAPDH  
← Nucleus  
← mbc

55 -  
43 -  
34 -  
-  
-

← GAPDH  
← Nucleus  
← mbc

(55.8 KDA)

Con Lps mbc Dms

Con Lps mbc Dms

75 -  
72 -  
55 -  
43 -  
34 -  
26 -

← Lamin B  
(66 KDA)  
← mbc  
← Cytosol

Con Lps mbc Dms

75 -  
72 -  
55 -  
43 -  
34 -  
26 -  
17 -

← Lamin B1  
(66 KDA)  
← mbc  
← Cytosol  
← Negative control

up to 16 min  
1 25, 8, 18

Inches 10 min  
12 min  
16 min

95 -  
72 -  
55 -  
43 -  
34 -  
26 -  
17 -  
10 -

↑ con ↑ Lps ↑ mBIC ↑ Dms ↑ Conp

GAPDH [16 min]  
mcf7  
(Nucleus)  
(35.8 kDA)

- 95  
- 72  
- 55  
- 43  
- 34  
- 26  
- 17  
- 10

↑ con ↑ Lps ↑ mBIC ↑ Dms ↑ Conp

GAPDH [16 min]  
MDA-MB-231  
(Nucleus)

4pt. 16 min

2.

25, 8, 18

95 -  
72 -  
55 -  
43 -  
39 -  
26 -  
17 -  
10 -

↑ con    ↑ LPS    ↑ MSIC    ↑ LPS    ↑ (ambb)

LAMiOR1 (66 KDA) [16 min]  
mcf7  
Cytosol

↑ con    ↑ LPS    ↑ MSIC    ↑ DAPA    ↑ (ambb)

LAMiOR1 [16 min]  
MDAMB  
(cytosol)

- 95  
- 72  
- 55  
- 43  
- 39  
- 26  
- 17
