# Supplementary material for: The role of miRNAs 34a, 146a, 320a and 542 in the synergistic anticancer effects of methyl 2-(5-fluoro-2-hydroxyphenyl)-1H- benzo[d]imidazole-5-carboxylate (MBIC) with doxorubicin in breast cancer cells
Source: PeerJ. 2018 Sep 17;6:e5577. doi: 10.7717/peerj.5577 (PMC6147144; doi:10.7717/peerj.5577)
Supplement: Supplemental Information 2 [file peerj-06-5577-s002.xlsx]

## Sheet: Sheet1
MCF-7 cell-line			TARGET microRNA: microRNA-34											MCF-7 cell-line			Reference control: U6
MBIC monotherapy
	Ct1	Ct2	Ct3	Ct Mean	SD										Ct1	Ct2	Ct3	Ct Mean	SD
Untreated	19.61	18.78	20.02	19.47	0.631744									Untreated	20.6	21.33	22.91	21.6133	0.516188
T1	18.09	19.02	18.7	18.6033	0.472476									T1	20.32	20.83	20.89	20.68	0.360624
T2	17.47	14.95	14.7	15.7067	1.5322									T2	20.81	20.67	21.19	20.89	0.0989949
T3	15.2	14.47	18.73	16.1333	2.27821									T3	20.98	22.28	21.31	21.5233	0.919239
NTC	‒	‒	‒											NTC	‒	‒	‒
DOXO monotherapy
	Ct1	Ct2	Ct3	Ct Mean	SD										Ct1	Ct2	Ct3	Ct Mean	SD
Untreated	23.22	23.22	23.83	23.4233	0.431335									Untreated	22.33	22.88	22.91	22.7067	0.0212132
T1	22.94	22.81	22.8	22.85	0.00707107									T1	22.26	22.34	22.51	22.37	0.120208
T2	22.42	22.25	22.64	22.4367	0.275772									T2	22.75	22.64	22.9	22.7633	0.183848
T3	22.88	22.25	22.88	22.67	0.445477									T3	22.66	22.54	22.53	22.5767	0.00707107
NTC	‒	‒	‒											NTC	‒	‒	‒
MBIC+DOXO combination therapy
	Ct1	Ct2	Ct3	Ct Mean	SD										Ct1	Ct2	Ct3	Ct Mean	SD
Untreated	31.18	20.23	30.91	27.44	7.5519									Untreated	27.29	29.65	27.34	28.0933	1.63342
T1	27.45	27.4	28.83	27.8933	1.01116									T1	27.47	32.29	27.84	29.2	3.14663
T2	23.72	23.5	23.64	23.62	0.0989949									T2	25.6	30.11	28.87	28.1933	0.876812
T3	21.32	21.32	21.7	21.4467	0.268701									T3	25.52	28.02	27.8	27.1133	0.155563
NTC	‒	‒	‒											NTC	‒	‒	‒
Calculatin of ΔCT: Average CT of target microRNA-Average CT of Reference control:														Calculatin of ΔΔCT: ΔCT of treated - ΔCT of untreated:													Fold difference in target microRNA relative to untreated: 2 power-ΔΔCT
	ΔCT-MBIC	ΔCT-DOXO	ΔCT-COMBO				ΔCT-MBIC	ΔCT-DOXO	ΔCT-COMBO						ΔΔCT-MBIC	ΔΔCT-DOXO	ΔΔCT-COMBO				ΔΔCT-MBIC	ΔΔCT-DOXO	ΔΔCT-COMBO					2pΔΔCT-MBIC	2pΔΔCT-DOXO	2pΔΔCT-COMBO
Untreated	-2.14333	0.716667	-0.653333			Untreated	0		0					Untreated	0	0	0			Untreated	0		0				Untreated	1	1	1
T1	-2.07667	0.48	-1.30667			T1	0		0					T1	0.0666667	-0.236667	-0.653333			T1	0		0				T1	0.954842	1.17827	1.5728
T2	-5.18333	-0.326667	-4.57333			T2	0		0					T2	-3.04	-1.04333	-3.92			T2	0		0				T2	8.22491	2.06098	15.1369
T3	-5.39	0.0933333	-5.66667			T3	0		0					T3	-3.24667	-0.623333	-5.01333			T3	0		0				T3	9.4917	1.54043	32.2971
NTC	‒	‒	‒			NTC	‒	‒	‒					NTC	‒	‒	‒			NTC	‒	‒	‒				NTC	‒	‒	‒
