# Supplementary material for: The role of miRNAs 34a, 146a, 320a and 542 in the synergistic anticancer effects of methyl 2-(5-fluoro-2-hydroxyphenyl)-1H- benzo[d]imidazole-5-carboxylate (MBIC) with doxorubicin in breast cancer cells
Source: PeerJ. 2018 Sep 17;6:e5577. doi: 10.7717/peerj.5577 (PMC6147144; doi:10.7717/peerj.5577)
Supplement: Supplemental Information 3 [file peerj-06-5577-s003.xlsx]

## Sheet: Sheet1
MCF-7 cell-line			TARGET microRNA: microRNA-146											MCF-7 cell-line			Reference control: U6
MBIC monotherapy
	Ct1	Ct2	Ct3	Ct Mean	SD		Ct1	Ct2	Ct3	Ct Mean	SD				Ct1	Ct2	Ct3	Ct Mean	SD		Ct1	Ct2	Ct3	Ct Mean	SD
Untreated	33.89	34.12	33.12	33.71	0.523737	Untreated	22.48	22.36	22.73	22.5233	0.188768			Untreated	23.77	22.09		22.93	1.18794	Untreated	20.6	21.33	22.91	20.965	0.516188
T1	34.54	37.58	35.47	35.8633	1.5577	T1	23.88	24.18	23.55	23.87	0.315119			T1	23.14	23.34		23.24	0.141421	T1	20.32	20.83	20.89	20.575	0.360624
T2	34.41	35.48	38.06	35.9833	1.87634	T2	23.61	23.4	24.25	23.7533	0.442757			T2	22.86	22.44		22.65	0.296985	T2	20.81	20.67	21.19	20.74	0.0989949
T3	35.8	32.22	38.21	35.41	3.01398	T3	24.1	23.36	25.44	24.3	1.05432			T3	23.66	23.95		23.805	0.205061	T3	20.98	22.28	21.31	21.63	0.919239
NTC	‒	‒	‒			NTC	‒	‒	‒					NTC	‒	‒	‒			NTC	‒	‒	‒
DOXO monotherapy
	Ct1	Ct2	Ct3	Ct Mean	SD										Ct1	Ct2	Ct3	Ct Mean	SD
Untreated	22.59	22.27	22.59	22.43	0.226274									Untreated	22.33	22.88	22.91	22.895	0.0212132
T1	22.92	21.79	22.23	22.01	0.311127									T1	22.26	22.34	22.51	22.425	0.120208
T2	21.99	22.56	22.95	22.755	0.275772									T2	22.75	22.64	22.9	22.77	0.183848
T3	22.29	22.39	22.52	22.455	0.0919239									T3	22.66	22.54	22.53	22.535	0.00707107
NTC	‒	‒	‒											NTC	‒	‒	‒
MBIC+DOXO combination therapy
	Ct1	Ct2	Ct3	Ct Mean	SD		Ct1	Ct2	Ct3	Ct Mean	SD				Ct1	Ct2	Ct3	Ct Mean	SD		Ct1	Ct2	Ct3	Ct Mean	SD
Untreated	31.69	32.14	33.91	32.58	1.25158	Untreated	21.33	21.55	21.95	21.75	0.282843			Untreated	27.29	29.65	27.34	28.495	1.63342	Untreated	22.96	22.9	22.77	22.835	0.0919239
T1	14.09	12.22	28.39	28.39	11.4339	T1	21.93	22.43	22.33	22.38	0.0707107			T1	27.47	32.29	27.84	30.065	3.14663	T1	22.48	22.57	22.13	22.35	0.311127
T2	11.21	9.04	10.49	10.2467	1.0253	T2	22.22	22.67	23.15	22.91	0.339411			T2	25.6	30.11	28.87	29.49	0.876812	T2	22.85	22.38	22.92	22.65	0.381838
T3	10.12	6.59	10.11	8.94	2.48902	T3	23.21	23.91	23.03	23.47	0.622254			T3	25.52	28.02	27.8	27.91	0.155563	T3	22.71	22.54	22.37	22.455	0.120208
NTC	‒	‒	‒			NTC	‒	‒	‒					NTC	‒	‒	‒			NTC	‒	‒	‒
Calculatin of ΔCT: Average CT of target microRNA-Average CT of Reference control:														Calculatin of ΔΔCT: ΔCT of treated - ΔCT of untreated:													Fold difference in target microRNA relative to untreated: 2 power-ΔΔCT
	ΔCT-MBIC	ΔCT-DOXO	ΔCT-COMBO				ΔCT-MBIC	ΔCT-DOXO	ΔCT-COMBO						ΔΔCT-MBIC	ΔΔCT-DOXO	ΔΔCT-COMBO				ΔΔCT-MBIC	ΔΔCT-DOXO	ΔΔCT-COMBO					2pΔΔCT-MBIC	2pΔΔCT-DOXO	2pΔΔCT-COMBO
Untreated	10.78	-0.465	9.745			Untreated	1.55833		-1.085					Untreated	0	0	0			Untreated	0		0				Untreated	1	1	1
T1	12.6233	-0.415	6.04			T1	3.295		0.03					T1	1.84333	0.05	-3.705			T1	1.73667		1.115				T1	0.278677	0.965936	13.0412
T2	13.3333	-0.015	-12.4033			T2	3.01333		0.26					T2	2.55333	0.45	-22.1483			T2	1.455		1.345				T2	0.170361	0.732043	4.6485e+06
T3	11.605	-0.08	-13.515			T3	2.67		1.015					T3	0.825	0.385	-23.26			T3	1.11167		2.1				T3	0.564482	0.765779	1.00452e+07
NTC	‒	‒	‒			NTC	‒	‒	‒					NTC	‒	‒	‒			NTC	‒	‒	‒				NTC	‒	‒	‒
																											Untreated	1		1
																											T1	0.300062		0.461691
																											T2	0.364755		0.393654
																											T3	0.462759		0.233258
																											NTC	‒	‒	‒
