# Supplementary material for: The role of miRNAs 34a, 146a, 320a and 542 in the synergistic anticancer effects of methyl 2-(5-fluoro-2-hydroxyphenyl)-1H- benzo[d]imidazole-5-carboxylate (MBIC) with doxorubicin in breast cancer cells
Source: PeerJ. 2018 Sep 17;6:e5577. doi: 10.7717/peerj.5577 (PMC6147144; doi:10.7717/peerj.5577)
Supplement: Supplemental Information 4 [file peerj-06-5577-s004.xlsx]

## Sheet: Sheet1
MCF-7 cell-line			TARGET microRNA: microRNA-320											MCF-7 cell-line			Reference control: U6
MBIC monotherapy
	Ct1	Ct2	Ct3	Ct Mean	SD		Ct1	Ct2	Ct3	Ct Mean	SD				Ct1	Ct2	Ct3	Ct Mean	SD		Ct1	Ct2	Ct3	Ct Mean	SD
Untreated	34.2		37.53	35.865	2.35467	Untreated	24.98	24.26	24.65	24.63	0.360416			Untreated	23.77	22.09		22.93	1.18794	Untreated	20.6	21.33	22.91	20.965	0.516188
T1	37.53	34.32		35.925	2.26981	T1	24.17	23.92	23.92	24.0033	0.144338			T1	23.14	23.34		23.24	0.141421	T1	20.32	20.83	20.89	20.575	0.360624
T2	36.96	23.75	35.13	31.9467	7.15725	T2	21.7	21.58	22.64	21.9733	0.58046			T2	22.86	22.44		22.65	0.296985	T2	20.81	20.67	21.19	20.74	0.0989949
T3	35.13	35.15	34.62	34.9667	0.300389	T3	24.25	23.68	21.31	23.08	1.55913			T3	23.66	23.95		23.805	0.205061	T3	20.98	22.28	21.31	21.63	0.919239
NTC	‒	‒	‒			NTC	‒	‒	‒					NTC	‒	‒	‒			NTC	‒	‒	‒
DOXO monotherapy
	Ct1	Ct2	Ct3	Ct Mean	SD										Ct1	Ct2	Ct3	Ct Mean	SD
Untreated	23.24	23.41	23.47	23.44	0.0424264									Untreated	22.33	22.88	22.91	22.895	0.0212132
T1	23.62	23.41	22.93	23.17	0.339411									T1	22.26	22.34	22.51	22.425	0.120208
T2	22.75	23.17	23.54	23.355	0.26163									T2	22.75	22.64	22.9	22.77	0.183848
T3	22.51	22.39	22.35	22.37	0.0282843									T3	22.66	22.54	22.53	22.535	0.00707107
NTC	‒	‒	‒											NTC	‒	‒	‒
MBIC+DOXO combination therapy
	Ct1	Ct2	Ct3	Ct Mean	SD		Ct1	Ct2	Ct3	Ct Mean	SD				Ct1	Ct2	Ct3	Ct Mean	SD		Ct1	Ct2	Ct3	Ct Mean	SD
Untreated	34.97	33.22	32.91	33.7	0.219203	Untreated	22.8	23.13	23.25	23.19	0.0848528			Untreated	27.29	29.65	27.34	28.495	1.63342	Untreated	22.96	22.9	22.77	22.835	0.0919239
T1	32.03	32.03	31.82	31.96	0.148492	T1	22.19	22.94	21.96	22.45	0.692965			T1	27.47	32.29	27.84	30.065	3.14663	T1	22.48	22.57	22.13	22.35	0.311127
T2	29.83	29.48	29.04	29.45	0.311127	T2	21.36	21.48	21.63	21.555	0.106066			T2	25.6	30.11	28.87	29.49	0.876812	T2	22.85	22.38	22.92	22.65	0.381838
T3	28.35	28.54	28.22	28.37	0.226274	T3	21.43	21.77	20.78	21.275	0.700036			T3	25.52	28.02	27.8	27.91	0.155563	T3	22.71	22.54	22.37	22.455	0.120208
NTC	‒	‒	‒			NTC	‒	‒	‒					NTC	‒	‒	‒			NTC	‒	‒	‒
Calculatin of ΔCT: Average CT of target microRNA-Average CT of Reference control:														Calculatin of ΔΔCT: ΔCT of treated - ΔCT of untreated:													Fold difference in target microRNA relative to untreated: 2 power-ΔΔCT
	ΔCT-MBIC	ΔCT-DOXO	ΔCT-COMBO				ΔCT-MBIC	ΔCT-DOXO	ΔCT-COMBO						ΔΔCT-MBIC	ΔΔCT-DOXO	ΔΔCT-COMBO				ΔΔCT-MBIC	ΔΔCT-DOXO	ΔΔCT-COMBO					2pΔΔCT-MBIC	2pΔΔCT-DOXO	2pΔΔCT-COMBO
Untreated	12.935	0.545	10.865			Untreated	3.665		0.355					Untreated	0	0	0			Untreated	0		0				Untreated	1	1	1
T1	12.685	0.745	9.61			T1	3.42833		0.1					T1	-0.25	0.2	-1.255			T1	-0.236667		-0.255				T1	1.18921	0.870551	2.38667
T2	9.29667	0.585	6.8			T2	1.23333		-1.095					T2	-3.63833	0.04	-4.065			T2	-2.43167		-1.45				T2	12.4522	0.972655	16.7374
T3	11.1617	-0.165	5.915			T3	1.45		-1.18					T3	-1.77333	-0.71	-4.95			T3	-2.215		-1.535				T3	3.41843	1.6358	30.91
NTC	‒	‒	‒			NTC	‒	‒	‒					NTC	‒	‒	‒			NTC	‒	‒	‒				NTC	‒	‒	‒
																											Untreated	1		1
																											T1	1.17827		1.19334
																											T2	5.39516		2.73208
																											T3	4.64282		2.89788
																											NTC	‒	‒	‒
