# Supplementary material for: The role of miRNAs 34a, 146a, 320a and 542 in the synergistic anticancer effects of methyl 2-(5-fluoro-2-hydroxyphenyl)-1H- benzo[d]imidazole-5-carboxylate (MBIC) with doxorubicin in breast cancer cells
Source: PeerJ. 2018 Sep 17;6:e5577. doi: 10.7717/peerj.5577 (PMC6147144; doi:10.7717/peerj.5577)
Supplement: Supplemental Information 9 [file peerj-06-5577-s009.xlsx]

## Sheet: Sheet1
MDA-MB-231			TARGET microRNA: microRNA-320											MDA-MB-231			Reference control: U6
MBIC monotherapy
	Ct1	Ct2	Ct3	Ct Mean	SD		Ct1	Ct2	Ct3	Ct Mean	SD				Ct1	Ct2	Ct3	Ct Mean	SD		Ct1	Ct2	Ct3	Ct Mean	SD
Untreated	27.07	35.48		27.07	5.94677	Untreated	30.1	30.63	30.06	30.2633	0.318172			Untreated	28.17	29.53	29.69	29.13	0.961665	Untreated	30.76	30.28	29.77	30.27	0.339411
T1		32.81		32.81	#DIV/0!	T1	31.49	30.94	30.98	31.1367	0.306649			T1	29.23	28.78	29.53	29.18	0.318198	T1	31.38	31.19	30.97	31.18	0.13435
T2	21.93	32.9		32.9	7.75696	T2	30.87		31.39	31.13	0.367696			T2	30.48	30.09	29.95	30.1733	0.275772	T2	30.34	29.87	30.59	30.2667	0.33234
T3	37.17	32.17	35.87	35.07	2.59422	T3	30.61	31.69	31.64	31.3133	0.609617			T3	30.9	28.57	29.09	29.52	1.64756	T3	30.07	30.05	30.24	30.12	0.0141421
NTC	‒	‒	‒			NTC	‒	‒	‒					NTC	‒	‒	‒			NTC	‒	‒	‒
DOXO monotherapy
	Ct1	Ct2	Ct3	Ct Mean	SD		Ct1	Ct2	Ct3	Ct Mean	SD				Ct1	Ct2	Ct3	Ct Mean	SD		Ct1	Ct2	Ct3	Ct Mean	SD
Untreated	36.95	32.22	39.64	36.27	5.24673	Untreated	31.21	31.88	31.44	31.51	0.311127			Untreated	28.17	29.53	29.69	29.13	0.113137	Untreated	30.76	30.28	29.77	30.27	0.360624
T1	30.77		31.35	31.06	#DIV/0!	T1	31.55	31.12	31.59	31.42	0.33234			T1	29.23	28.78	29.53	29.18	0.53033	T1	31.38	31.19	30.97	31.18	0.155563
T2	34.14		35.15	34.645	#DIV/0!	T2	31.93	31.61	31.73	31.7567	0.0848528			T2	31.48	30.69	29.95	30.7067	0.523259	T2	30.34	29.87	30.59	30.2667	0.509117
T3	7.73	33.88		20.805	#DIV/0!	T3	31.81	30.57	30.82	31.0667	0.176777			T3	30.9	28.57	29.09	29.52	0.367696	T3	30.07	30.05	30.24	30.12	0.13435
NTC	‒	‒	‒			NTC	‒	‒	‒					NTC	‒	‒	‒			NTC	‒	‒	‒
MBIC+DOXO combination therapy
	Ct1	Ct2	Ct3	Ct Mean	SD		Ct1	Ct2	Ct3	Ct Mean	SD				Ct1	Ct2	Ct3	Ct Mean	SD		Ct1	Ct2	Ct3	Ct Mean	SD
Untreated	30.75	29.83	30.77	30.45	0.66468	Untreated	31.27	31.99	32.06	31.27	0.0494975			Untreated	27.28	26.65	25.18	26.37	1.03945	Untreated	27.29	29.65	27.34	28.0933	1.63342
T1	30.31	31.06	30.49	30.62	0.403051	T1	31.92	32.8	32.18	32.18	0.438406			T1	27.96	25.69	28.71	27.4533	2.13546	T1	27.47	32.29	27.84	29.2	3.14663
T2	30.7	30.73	30.09	30.5067	0.452548	T2	30.95	30.56	30.55	30.95	0.00707107			T2	26.17	27.22	30.15	27.8467	2.07182	T2	25.6	30.11	28.87	28.1933	0.876812
T3	29.7	28.4	28.2	28.7667	0.141421	T3	29.03	29.08	28.9	29.08	0.127279			T3	25.67	25.89	27.37	26.31	1.04652	T3	25.52	28.02	27.8	27.1133	0.155563
NTC	‒	‒	‒			NTC	‒	‒	‒					NTC	‒	‒	‒			NTC	‒	‒	‒
Calculatin of ΔCT: Average CT of target microRNA-Average CT of Reference control:														Calculatin of ΔΔCT: ΔCT of treated - ΔCT of untreated:													Fold difference in target microRNA relative to untreated: 2 power-ΔΔCT
	ΔCT-MBIC	ΔCT-DOXO	ΔCT-COMBO				ΔCT-MBIC	ΔCT-DOXO	ΔCT-COMBO						ΔΔCT-MBIC	ΔΔCT-DOXO	ΔΔCT-COMBO				ΔΔCT-MBIC	ΔΔCT-DOXO	ΔΔCT-COMBO					2pΔΔCT-MBIC	2pΔΔCT-DOXO	2pΔΔCT-COMBO
Untreated	-2.06	7.14	4.08			Untreated	-0.00666667	2.38	3.17667					Untreated	0	0	0			Untreated	0	0	0				Untreated	1	1	1
T1	3.63	1.88	3.16667			T1	-0.0433333	2.24	2.98					T1	5.69	-5.26	-0.913333			T1	-0.0366667	-0.14	-0.196667				T1	0.0193704	38.3193	1.88339
T2	2.72667	3.93833	2.66			T2	0.863333	1.05	2.75667					T2	4.78667	-3.20167	-1.42			T2	0.87	-1.33	-0.42				T2	0.0362301	9.20021	2.67586
T3	5.55	-8.715	2.45667			T3	1.19333	1.54667	1.96667					T3	7.61	-15.855	-1.62333			T3	1.2	-0.833333	-1.21				T3	0.00511872	59269.4	3.08086
NTC	‒	‒	‒			NTC	‒	‒	‒					NTC	‒	‒	‒			NTC	‒	‒	‒				NTC	‒	‒	‒
																											Untreated	1	1	1
																											T1	1.02574	1.10191	1.14605
																											T2	0.547147	2.51403	1.33793
																											T3	0.435275	1.7818	2.31338
																											NTC	‒	‒	‒
