# Supplementary material for: The role of miRNAs 34a, 146a, 320a and 542 in the synergistic anticancer effects of methyl 2-(5-fluoro-2-hydroxyphenyl)-1H- benzo[d]imidazole-5-carboxylate (MBIC) with doxorubicin in breast cancer cells
Source: PeerJ journal article supplement (doi:10.7717/peerj.5577), 2018-09-17
Supplement: Western_blot._Raw_data_(1).zip [file Western_blot._Raw_data_%281%29.zip]

- 1) Survivin. MCF7 Cells
- 2) Actin. MCF7 Cells
- 3) Survivin. MDA-MB-231 Cells
- 4) Actin. MDA-MB-231 Cells
  
- 5) NF-kB. MCF7 Cells (Cytosol)
- 6) GAPDH. MCF7 Cells (Cytosol)
- 7) NF-kB. MCF7 Cells (Nucleus)
- 8) Lamin B1. MCF7 Cells (Nucleus)
  
- 9) NF-kB. MDA-MB-231 Cells (Cytosol)
- 10) GAPDH. MDA-MB-231 Cells (Cytosol)
- 11) NF-kB. MDA-MB-231 Cells (Nucleus)
- 12) Lamin B1. MDA-MB-231 Cells (Nucleus)
